# Supplementary material for: Worldwide Vaccination Willingness for COVID-19: A Systematic Review and Meta-Analysis
Source: MDPI journal article supplement (doi:10.3390/vaccines9101071), 2021-09-24
Supplement: s1 [file s1]

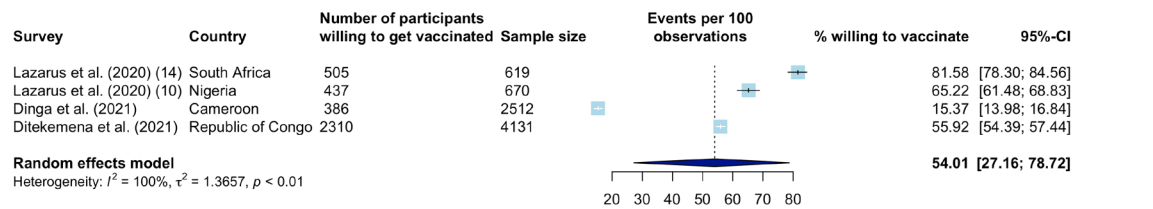

**Figure S1.1.** Forest plot of vaccination willingness in the African continent

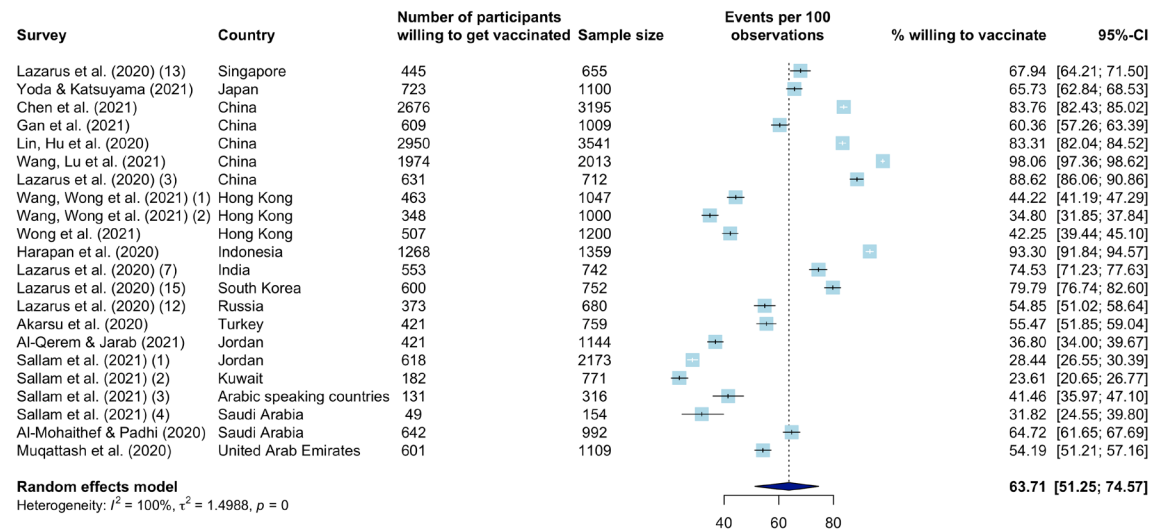

**Figure S1.2.** Forest plot of vaccination willingness in the Asian continent

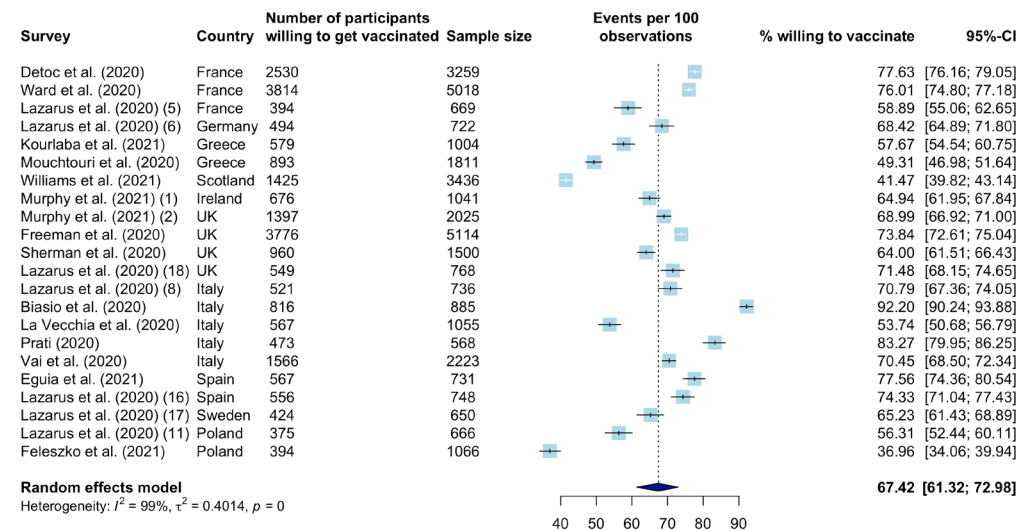

**Figure S1.3.** Forest plot of vaccination willingness in the European continent

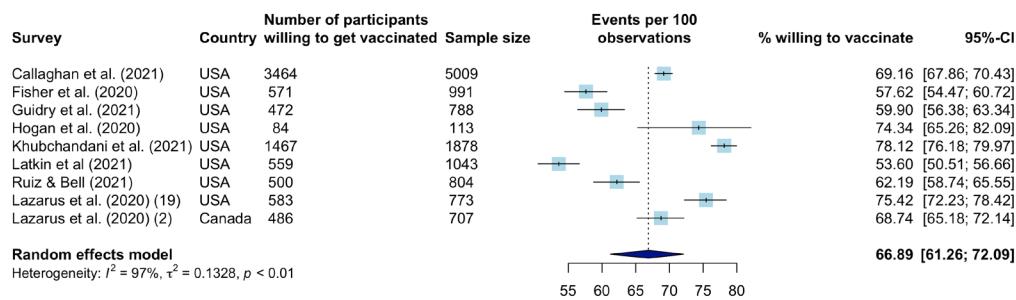

**Figure S1.4.** Forest plot of vaccination willingness in the North American continent

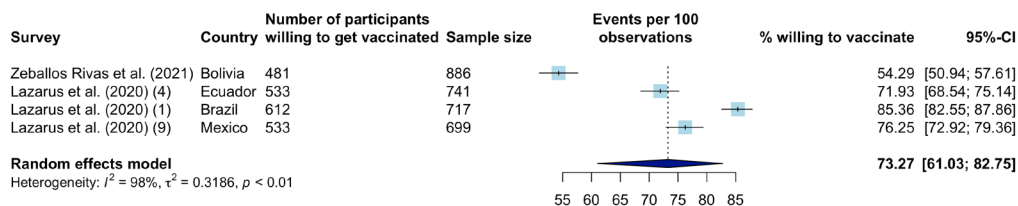

**Figure S1.5.** Forest plot of vaccination willingness in the South American continent

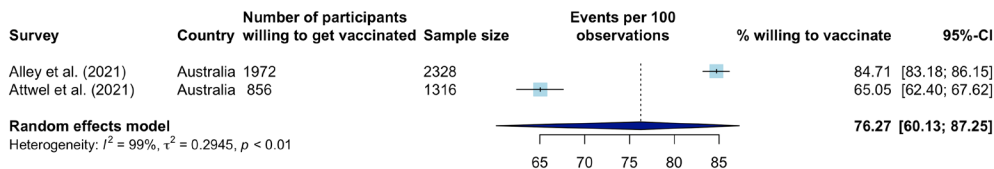

**Figure S1.6.** Forest plot of vaccination willingness in Oceania

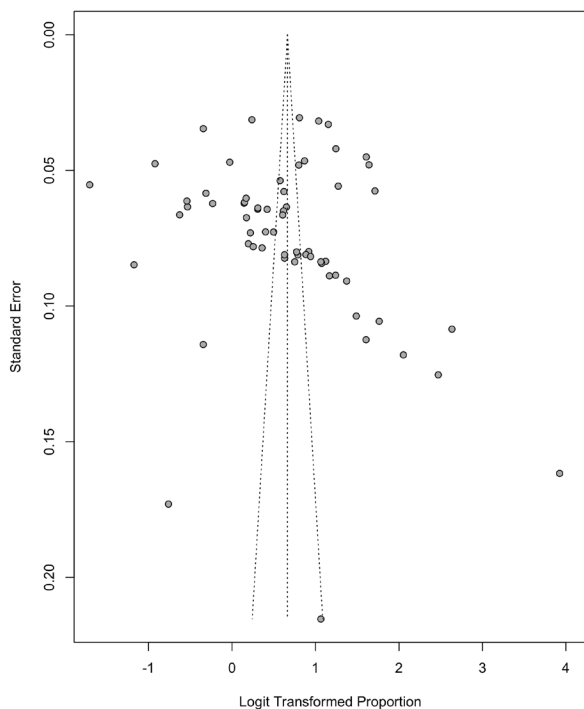

**Figure S2.** Funnel plot of the proportion of the worldwide vaccination willingness
